# Supplementary material
Source: PubMed Central journal article supplement (PMC5928455)
Supplement: kwx304lopezwebmaterialfinal.pdf [file kwx304lopezwebmaterialfinal.pdf]

Web Table 1. Stratified by BMI (BMI<25, BMI 25-29, BMI≥30) the association of cumulative average intake of total coffee, regular coffee, and decaffeinated coffee with erectile dysfunction (ED) in the Health Professionals Follow-Up Study, 1998-2010

| Type of coffee and BMI categories | Coffee Intake, cups/day |          |      |            |          |            |        |            |      |            |      | P for trend | P for interaction |
|-----------------------------------|-------------------------|----------|------|------------|----------|------------|--------|------------|------|------------|------|-------------|-------------------|
|                                   | No coffee <sup>a</sup>  |          | <0.5 |            | 0.5-0.99 |            | 1-3.99 |            | ≥4   |            |      |             |                   |
|                                   | HR                      | 95% CI   | HR   | 95% CI     | HR       | 95% CI     | HR     | 95% CI     | HR   | 95% CI     |      |             |                   |
| Total coffee                      |                         |          |      |            |          |            |        |            |      |            |      | 0.07        |                   |
| BMI <25                           |                         |          |      |            |          |            |        |            |      |            |      |             |                   |
| Model 1 <sup>b</sup>              | 1.00                    | Referent | 0.88 | 0.76, 1.02 | 0.88     | 0.75, 1.02 | 0.93   | 0.82, 1.04 | 0.93 | 0.78, 1.11 | 0.63 |             |                   |
| BMI 25-29                         |                         |          |      |            |          |            |        |            |      |            |      |             |                   |
| Model 1                           | 1.00                    | Referent | 0.92 | 0.74, 1.09 | 0.92     | 0.80, 1.17 | 0.98   | 0.86, 1.17 | 0.97 | 0.85, 1.22 | 0.74 |             |                   |
| BMI ≥ 30                          |                         |          |      |            |          |            |        |            |      |            |      |             |                   |
| Model 1                           | 1.00                    | Referent | 1.40 | 0.27, 1.93 | 1.15     | 0.26, 2.02 | 1.30   | 0.72, 2.95 | 1.36 | 0.59, 2.56 | 0.08 |             |                   |
| Regular coffee                    |                         |          |      |            |          |            |        |            |      |            |      | 0.16        |                   |
| BMI <25                           |                         |          |      |            |          |            |        |            |      |            |      |             |                   |
| Model 1                           | 1.00                    | Referent | 0.98 | 0.87, 1.10 | 0.96     | 0.84, 1.10 | 0.98   | 0.88, 1.09 | 0.88 | 0.70, 1.10 | 0.52 |             |                   |
| BMI 25-29                         |                         |          |      |            |          |            |        |            |      |            |      |             |                   |
| Model 1                           | 1.00                    | Referent | 1.05 | 0.94, 1.19 | 1.04     | 0.91, 1.18 | 1.05   | 0.94, 1.16 | 1.03 | 0.87, 1.22 | 0.60 |             |                   |
| BMI ≥ 30                          |                         |          |      |            |          |            |        |            |      |            |      |             |                   |
| Model 1                           | 1.00                    | Referent | 1.24 | 0.98, 1.57 | 1.33     | 1.04, 1.71 | 1.15   | 0.94, 1.40 | 1.20 | 0.88, 1.63 | 0.51 |             |                   |
| Decaffeinated coffee              |                         |          |      |            |          |            |        |            |      |            |      | 0.88        |                   |
| BMI <25                           |                         |          |      |            |          |            |        |            |      |            |      |             |                   |

|           |      |          |      |               |      |               |      |               |      |               |      |  |
|-----------|------|----------|------|---------------|------|---------------|------|---------------|------|---------------|------|--|
| Model 1   | 1.00 | Referent | 0.93 | 0.85,<br>1.03 | 0.96 | 0.85,<br>1.08 | 1.08 | 0.97,<br>1.20 | 0.99 | 0.60,<br>1.63 | 0.17 |  |
| BMI 25-29 |      |          |      |               |      |               |      |               |      |               |      |  |
| Model 1   | 1.00 | Referent | 1.01 | 0.92,<br>1.10 | 1.00 | 0.89,<br>1.11 | 1.01 | 0.91,<br>1.11 | 1.61 | 1.19,<br>2.19 | 0.45 |  |
| BMI ≥ 30  |      |          |      |               |      |               |      |               |      |               |      |  |
| Model 1   | 1.00 | Referent | 1.13 | 0.96,<br>1.32 | 1.12 | 0.91,<br>1.38 | 1.05 | 0.87,<br>1.27 | 1.49 | 0.84,<br>2.65 | 0.45 |  |

Abbreviations: CI, confidence interval; HR, hazard ratio; BMI, body mass index

<sup>a</sup> Included men who drink no regular or decaffeinated coffee.

<sup>b</sup> Models were adjusted for age in months, calendar time, smoking (never, past, or current 1–14, 15–24, ≥25 cigarettes/d), alcohol (gm/d, 0; 0.1-4.9; 5-14.9;15-29.9;30+), total activity metabolic equivalent/week(quintiles), history of diabetes (yes/no), history of hypertension (yes/no), history of hypercholesterolemia (yes/no), history of cardiovascular disease (yes/no), energy intake (kcal/d, quintiles), AHEI score(quintiles), marital status (married, divorced, separated, widowed, or never married), race (White, African-American, Asian American, Other), difficulty of falling into sleep(yes/no), wake up during night(yes/no), not feel rested when wake up (yes/no), medication for lowering cholesterol, lowering blood pressure and sleep medicine (yes/no).

<sup>b</sup>Reference group is men who drink no regular or decaffeinated coffee.

Web Table 2. Stratified by hypertension history (yes/no) the association of cumulative average intake of total coffee, regular coffee, and decaffeinated coffee with erectile dysfunction (ED) in the Health Professionals Follow-Up Study, 1998-2010

| Type of coffee and Hypertension status | Coffee Intake, cups/day |          |      |            |          |            |        |            |      |            |      | P for trend | P for interaction |
|----------------------------------------|-------------------------|----------|------|------------|----------|------------|--------|------------|------|------------|------|-------------|-------------------|
|                                        | No coffee <sup>a</sup>  |          | <0.5 |            | 0.5-0.99 |            | 1-3.99 |            | ≥4   |            |      |             |                   |
|                                        | HR                      | 95% CI   | HR   | 95% CI     | HR       | 95% CI     | HR     | 95% CI     | HR   | 95% CI     |      |             |                   |
| Total coffee                           |                         |          |      |            |          |            |        |            |      |            |      | 0.25        |                   |
| Hypertension (No)                      |                         |          |      |            |          |            |        |            |      |            |      |             |                   |
| Model 1 <sup>b</sup>                   | 1.00                    | Referent | 0.93 | 0.83, 1.04 | 0.93     | 0.83, 1.04 | 0.97   | 0.89, 1.06 | 0.97 | 0.87, 1.09 | 0.92 |             |                   |
| Hypertension (Yes)                     |                         |          |      |            |          |            |        |            |      |            |      |             |                   |
| Model 1                                | 1.00                    | Referent | 1.03 | 0.80, 1.33 | 0.95     | 0.74, 1.22 | 1.08   | 0.88, 1.32 | 1.07 | 0.81, 1.42 | 0.33 |             |                   |
| Regular coffee                         |                         |          |      |            |          |            |        |            |      |            |      | 0.25        |                   |
| Hypertension (No)                      |                         |          |      |            |          |            |        |            |      |            |      |             |                   |
| Model 1                                | 1.00                    | Referent | 1.01 | 0.93, 1.10 | 0.97     | 0.88, 1.07 | 1.00   | 0.93, 1.08 | 1.00 | 0.87, 1.13 | 0.93 |             |                   |
| Hypertension (Yes)                     |                         |          |      |            |          |            |        |            |      |            |      |             |                   |
| Model 1                                | 1.00                    | Referent | 1.19 | 0.94, 1.19 | 1.32     | 0.91, 1.18 | 1.15   | 0.94, 1.16 | 0.97 | 0.69, 1.37 | 0.42 |             |                   |
| Decaffeinated coffee                   |                         |          |      |            |          |            |        |            |      |            |      | 0.72        |                   |
| Hypertension (No)                      |                         |          |      |            |          |            |        |            |      |            |      |             |                   |
| Model 1                                | 1.00                    | Referent | 0.99 | 0.93, 1.06 | 1.01     | 0.93, 1.09 | 1.02   | 0.95, 1.10 | 1.31 | 1.01, 1.70 | 0.28 |             |                   |
| Hypertension (Yes)                     |                         |          |      |            |          |            |        |            |      |            |      |             |                   |

|         |      |          |      |               |      |               |      |               |      |               |      |  |
|---------|------|----------|------|---------------|------|---------------|------|---------------|------|---------------|------|--|
| Model 1 | 1.00 | Referent | 0.97 | 0.84,<br>1.13 | 0.97 | 0.81,<br>1.15 | 1.05 | 0.90,<br>1.23 | 1.43 | 0.83,<br>2.44 | 0.38 |  |
|---------|------|----------|------|---------------|------|---------------|------|---------------|------|---------------|------|--|

Abbreviations: CI, confidence interval; HR, hazard ratio; BMI, body mass index

<sup>a</sup> Included men who drink no regular or decaffeinated coffee.

<sup>b</sup> Models which were adjusted for age in months, calendar time, smoking (never, past, or current 1–14, 15–24, ≥25 cigarettes/d), BMI (kg/m<sup>2</sup>, <25;25-29.9;30+), alcohol (gm/d, 0; 0.1-4.9; 5-14.9;15-29.9;30+), total activity metabolic equivalent/week (quintiles), history of diabetes (yes/no), history of hypercholesterolemia (yes/no), history of cardiovascular disease (yes/no), energy intake (kcal/d, quintiles), AHEI score(quintiles), marital status (married, divorced, separated, widowed, or never married), race (White, African-American, Asian American, Other), difficulty of falling into sleep(yes/no), wake up during night(yes/no), not feel rested when wake up (yes/no), medication for lowering cholesterol, lowering blood pressure and sleep medicine (yes/no).

Web Table 3. Stratified by currently married (yes/no) the association of cumulative average intake of total coffee, regular coffee, and decaffeinated coffee with erectile dysfunction (ED) in the Health Professionals Follow-Up Study, 1998-2010

|                                   |                        | Coffee Intake, cups/day |      |            |          |            |        |            |      |            |             |                   |
|-----------------------------------|------------------------|-------------------------|------|------------|----------|------------|--------|------------|------|------------|-------------|-------------------|
| Type of coffee and Marital status | No coffee <sup>a</sup> |                         | <0.5 |            | 0.5-0.99 |            | 1-3.99 |            | ≥4   |            | P for trend | P for interaction |
|                                   | HR                     | 95% CI                  | HR   | 95% CI     | HR       | 95% CI     | HR     | 95% CI     | HR   | 95% CI     |             |                   |
| Total coffee                      |                        |                         |      |            |          |            |        |            |      |            |             | 0.32              |
| Not Currently married             |                        |                         |      |            |          |            |        |            |      |            |             |                   |
| Model 1 <sup>b</sup>              | 1.00                   | Referent                | 1.03 | 0.73, 1.45 | 0.86     | 0.60, 1.23 | 1.07   | 0.81, 1.43 | 1.21 | 0.83, 1.77 | 0.28        |                   |
| Currently married                 |                        |                         |      |            |          |            |        |            |      |            |             |                   |
| Model 1                           | 1.00                   | Referent                | 0.93 | 0.83, 1.03 | 0.92     | 0.83, 1.02 | 0.97   | 0.89, 1.06 | 0.97 | 0.87, 1.08 | 0.94        |                   |
| Regular coffee                    |                        |                         |      |            |          |            |        |            |      |            |             | 0.67              |
| Not Currently married             |                        |                         |      |            |          |            |        |            |      |            |             |                   |
| Model 1                           | 1.00                   | Referent                | 1.11 | 0.84, 1.46 | 1.14     | 0.85, 1.54 | 1.10   | 0.86, 1.41 | 1.15 | 0.76, 1.74 | 0.53        |                   |
| <b>Currently married</b>          |                        |                         |      |            |          |            |        |            |      |            |             |                   |
| Model 1                           | 1.00                   | Referent                | 1.03 | 0.95, 1.12 | 1.01     | 0.92, 1.10 | 1.02   | 0.94, 1.09 | 0.99 | 0.87, 1.12 | 0.94        |                   |
| Decaffeinated coffee              |                        |                         |      |            |          |            |        |            |      |            |             | 0.08              |
| Not Currently married             |                        |                         |      |            |          |            |        |            |      |            |             |                   |
| Model 1                           | 1.00                   | Referent                | 0.99 | 0.82, 1.19 | 0.98     | 0.77, 1.25 | 1.20   | 0.96, 1.51 | 2.57 | 1.00, 6.59 | 0.10        |                   |
| Currently married                 |                        |                         |      |            |          |            |        |            |      |            |             |                   |

|         |      |          |      |               |      |               |      |               |      |               |      |  |
|---------|------|----------|------|---------------|------|---------------|------|---------------|------|---------------|------|--|
| Model 1 | 1.00 | Referent | 0.98 | 0.92,<br>1.05 | 1.00 | 0.92,<br>1.08 | 1.01 | 0.94,<br>1.09 | 1.29 | 1.01,<br>1.65 | 0.35 |  |
|---------|------|----------|------|---------------|------|---------------|------|---------------|------|---------------|------|--|

Abbreviations: CI, confidence interval; HR, hazard ratio

<sup>a</sup> Included men who drink no regular or decaffeinated coffee.

<sup>b</sup> Models were adjusted for age in months, calendar time, smoking (never, past, or current 1–14, 15–24, ≥25 cigarettes/d), BMI (kg/m<sup>2</sup>, <25;25-29.9;30+), alcohol (gm/d, 0; 0.1-4.9; 5-14.9;15-29.9;30+), total activity metabolic equivalent/week (quintiles), history of diabetes (yes/no), history of hypertension (yes/no), history of hypercholesterolemia (yes/no), history of cardiovascular disease (yes/no), energy intake (kcal/d, quintiles), AHEI score (quintiles), race (White, African-American, Asian American, Other), difficulty of falling into sleep(yes/no), wake up during night(yes/no), not feel rested when wake up (yes/no), medication for lowering cholesterol, lowering blood pressure and sleep medicine (yes/no).

<sup>b</sup> Reference group is men who drink no regular or decaffeinated coffee.

Web Table 4. Stratified by Alcohol: the association of cumulative average intake of total coffee, regular coffee, and decaffeinated coffee with erectile dysfunction (ED) in the Health Professionals Follow-Up Study, 1998-2010

| Type of coffee and Alcohol intake | Coffee Intake, cups/day |          |      |            |          |            |        |            |      |            |      | P for trend | P for interaction |
|-----------------------------------|-------------------------|----------|------|------------|----------|------------|--------|------------|------|------------|------|-------------|-------------------|
|                                   | No coffee <sup>a</sup>  |          | <0.5 |            | 0.5-0.99 |            | 1-3.99 |            | ≥4   |            |      |             |                   |
|                                   | HR                      | 95% CI   | HR   | 95% CI     | HR       | 95% CI     | HR     | 95% CI     | HR   | 95% CI     |      |             |                   |
| Total coffee                      |                         |          |      |            |          |            |        |            |      |            |      | 0.70        |                   |
| Alcohol 0 g/day                   |                         |          |      |            |          |            |        |            |      |            |      |             |                   |
| Model 1 <sup>b</sup>              | 1.00                    | Referent | 1.02 | 0.87, 1.20 | 0.98     | 0.82, 1.18 | 0.95   | 0.83, 1.08 | 1.09 | 0.88, 1.34 | 0.73 |             |                   |
| Alcohol 0.1-14.9 g/day            |                         |          |      |            |          |            |        |            |      |            |      |             |                   |
| Model 1                           | 1.00                    | Referent | 0.96 | 0.82, 1.12 | 0.92     | 0.79, 1.07 | 1.04   | 0.92, 1.18 | 0.99 | 0.84, 1.16 | 0.28 |             |                   |
| Alcohol ≥15 g/day                 |                         |          |      |            |          |            |        |            |      |            |      |             |                   |
| Model 1                           | 1.00                    | Referent | 0.76 | 0.59-0.97  | 0.82     | 0.64-1.04  | 0.85   | 0.70, 1.05 | 0.85 | 0.67, 1.07 | 0.93 |             |                   |
| Regular coffee                    |                         |          |      |            |          |            |        |            |      |            |      | 0.93        |                   |
| Alcohol 0 g/day                   |                         |          |      |            |          |            |        |            |      |            |      |             |                   |
| Model 1                           | 1.00                    | Referent | 0.96 | 0.83, 1.11 | 1.11     | 0.94, 1.32 | 0.94   | 0.82, 1.06 | 1.07 | 0.82, 1.39 | 0.67 |             |                   |
| Alcohol 0.1-14.9 g/day            |                         |          |      |            |          |            |        |            |      |            |      |             |                   |
| Model 1                           | 1.00                    | Referent | 1.14 | 1.01, 1.28 | 1.13     | 1.00, 1.29 | 1.11   | 1.00, 1.23 | 1.05 | 0.87, 1.27 | 0.32 |             |                   |
| Alcohol ≥15 g/day                 |                         |          |      |            |          |            |        |            |      |            |      |             |                   |
| Model 1                           | 1.00                    | Referent | 0.98 | 0.83, 1.17 | 0.86     | 0.71, 1.03 | 0.97   | 0.83, 1.13 | 0.90 | 0.72, 1.12 | 0.61 |             |                   |

|                        |      |          |      |            |      |            |      |            |      |            |      |      |
|------------------------|------|----------|------|------------|------|------------|------|------------|------|------------|------|------|
| Decaffeinated coffee   |      |          |      |            |      |            |      |            |      |            |      | 0.93 |
| Alcohol 0 g/day        |      |          |      |            |      |            |      |            |      |            |      |      |
| Model 1                | 1.00 | Referent | 1.03 | 0.92, 1.17 | 0.97 | 0.82, 1.14 | 1.02 | 0.88, 1.19 | 1.50 | 0.92, 2.47 | 0.69 |      |
| Alcohol 0.1-14.9 g/day |      |          |      |            |      |            |      |            |      |            |      |      |
| Model 1                | 1.00 | Referent | 0.96 | 0.87, 1.04 | 0.98 | 0.88, 1.10 | 1.06 | 0.97, 1.17 | 1.21 | 0.83, 1.76 | 0.14 |      |
| Alcohol >=15 g/day     |      |          |      |            |      |            |      |            |      |            |      |      |
| Model 1                | 1.00 | Referent | 1.02 | 0.91, 1.15 | 1.07 | 0.98, 1.23 | 1.02 | 0.90, 1.15 | 1.39 | 0.95, 2.05 | 0.43 |      |

Abbreviations: CI, confidence interval; HR, hazard ratio; BMI, body mass index

<sup>a</sup> Included men who drink no regular or decaffeinated coffee.

<sup>b</sup> Models which were adjusted for age in months, calendar time, smoking (never, past, or current 1–14, 15–24, ≥25 cigarettes/d), BMI (kg/m<sup>2</sup>, <25;25-29.9;30+), total activity metabolic equivalent/week (quintiles), history of diabetes (yes/no), history of hypertension (yes/no), history of hypercholesterolemia (yes/no), history of cardiovascular disease (yes/no), energy intake (kcal/d, quintiles), AHEI score (quintiles), marital status (married, divorced, separated, widowed, or never married), race (White, African-American, Asian American, Other), difficulty of falling into sleep(yes/no), wake up during night(yes/no), not feel rested when wake up (yes/no), medication for lowering cholesterol, lowering blood pressure and sleep medicine (yes/no).
